# Supplementary material for: Solvent-dependent supramolecular assembly behavior of a coumarin-headed amphiphile
Source: Royal Society of Chemistry journal article supplement (doi:10.1039/d3sm00488k), 2023-01-01
Supplement: d3sm00488k1.pdf [file d3sm00488k1.pdf]

## Supporting Information

### Solvent-dependent supramolecular assembly behavior of a coumarin-headed amphiphile

Yuxue Zhou,<sup>ab</sup> Yuqian Jiang,<sup>\*b</sup> Xiao Zhang,<sup>\*a</sup> Donglan Sun,<sup>a</sup> and Jian Jiang,<sup>\*b</sup>

<sup>a</sup>Department of Chemistry, School of Science, Tianjin University of Science and Technology, Tianjin 300457, P. R. China, zhangxiao@tust.edu.cn

<sup>b</sup>CAS Key Laboratory of Nanosystem and Hierarchical Fabrication, CAS Center for Excellence in Nanoscience, Nanophotonics Research Division, National Center for Nanoscience and Technology (NCNST) No.11 ZhongGuanCun BeiYiTiAo, 100190 Beijing, P.R. China, E-mail: jianyq@nanoctr.cn, jiangj@nanoctr.cn

#### The cooperative model for LG-Cm aggregation in toluene

Cooperative self-assembly model<sup>1</sup> has been described by a nucleation-growth model, which is characterized by the unfavorable formation of nuclei of a critical size, followed by a favorable elongation process. The nucleation and elongation regime are governed by the following equations S1 and S2 respectively.

$$\phi_n = K_a^{1/3} \exp\left[(2/3 K_a^{-1/3} - 1) \frac{h_e}{RT_e^2} (T - T_e)\right] \quad \text{S1}$$

$$\phi_n = \phi_{\text{SAT}} \left(1 - \exp\left[-\frac{h_e}{RT_e^2} (T - T_e)\right]\right) \quad \text{S2}$$

$\phi_n$  is the degree of aggregation, and  $\phi_n/\phi_{\text{SAT}}$  is a factor introduced to the equation such that does not exceed unity.  $h_e$  is the molecular enthalpy released due to noncovalent interactions during elongation,  $T_e$  is the elongation temperature,  $T$  is the absolute temperature,  $K_a$  is the dimensionless equilibrium constant of the nucleation process at  $T_e$  and  $R$  is the gas constant.

The relationship between equilibrium constant of elongation  $K_e$  and the degree of aggregation also is given by S3; Gibbs free energy of elongation  $\Delta G$  can be expressed as a function of absolute temperature by making use of the Van 't Hoff equation S4:

$$\alpha = 1 - \frac{[A]}{c_T} = 1 - \frac{1}{K_e c_T} \quad \text{S3}$$

$$\ln K_e = -\frac{\Delta G}{RT} \quad \text{S4}$$

#### The isodesmic model for LG-Cm aggregation in DMSO

The isodesmic model<sup>2</sup> is approximated by Equation S5 in which  $T_m$  is the melting temperature defined as the temperature for which  $\alpha = 0.5$ ,  $\Delta H$  is the molar enthalpy release related to the formation of non-covalent intermolecular interactions and  $R$  is the gas constant. It is also known as the equal- $K$  model. In an isodesmic mechanism, the degree of aggregation,  $\alpha$  is related to temperature  $T$  by equation below:

$$\alpha(T) = \frac{1}{1 + \exp\left[-0.908\frac{\Delta H}{RT_m} \frac{T - T_m}{T_m}\right]} \quad \text{S5}$$

The above equation could be utilized to fit the experimental data obtained from the CD absorption change at different temperature such that  $\Delta H$  and  $T_m$  could be obtained.

From the degree of aggregation, the number-averaged degree of polymerisation,  $DP_N$ , can be calculated directly by equation S6:

$$DP_N(T) = \frac{1}{\sqrt{1-\alpha(T)}} \quad \text{S6}$$

Furthermore, the number-averaged degree of polymerisation is also related to the total concentration of molecules,  $c_T$ , and the equilibrium constant,  $K_e$ , via equation S7:

$$DP_N(T) = \frac{1}{2} + \frac{1}{2} \sqrt{4K_e(T)c_T + 1} \quad \text{S7}$$

The temperature dependence of the degree of aggregation can be expressed as a function of absolute temperature by making use of the Van 't Hoff equation S8:

$$\ln K_e = -\frac{\Delta G}{RT} \quad \text{S8}$$

### Supplementary Figures

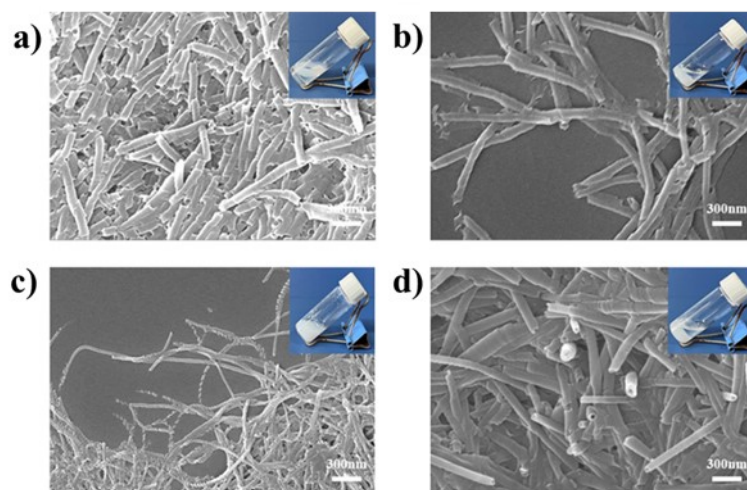

**Figure S1.** SEM image of **LG-Cm** in different polar solvents. a) **LG-Cm** in DCM, b) **LG-Cm** in EA, c) **LG-Cm** in ACN, d) **LG-Cm** in DMF.

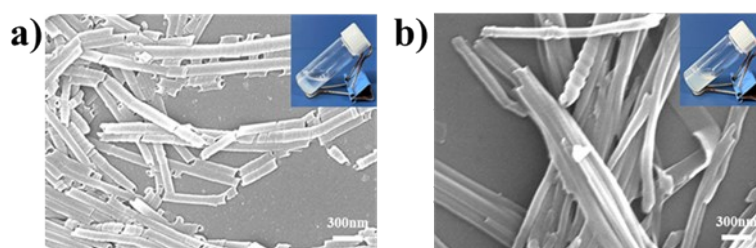

**Figure S2.** SEM image of **DG-Cm** in toluene and DMSO. a) **DG-Cm** in toluene, b) **DG-Cm** in DMSO.

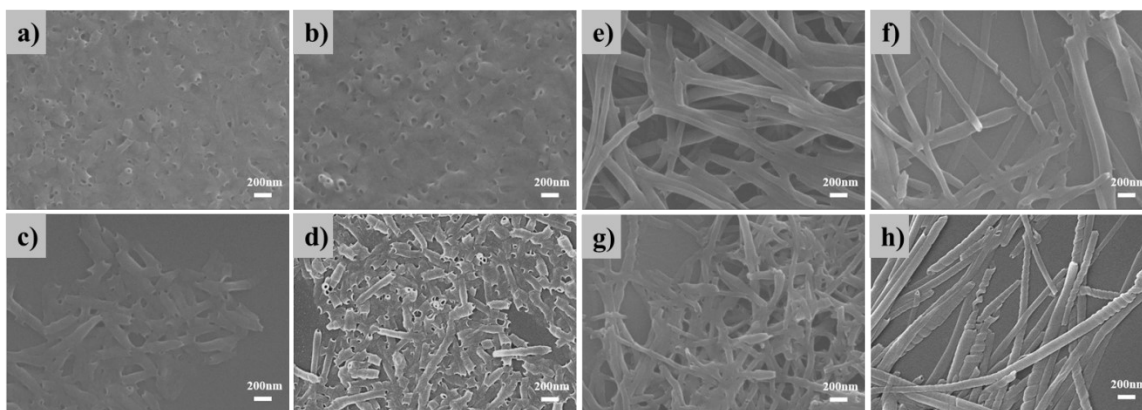

**Figure S3.** The SEM images of **LG-Cm** in toluene at different concentrations with a)  $1 \times 10^{-4}$  M, b)  $5 \times 10^{-4}$  M, c)  $1 \times 10^{-3}$  M, d)  $5 \times 10^{-3}$  M, and in DMSO with e)  $1 \times 10^{-4}$  M, f)  $5 \times 10^{-4}$  M, g)  $1 \times 10^{-3}$  M, h)  $5 \times 10^{-3}$  M.

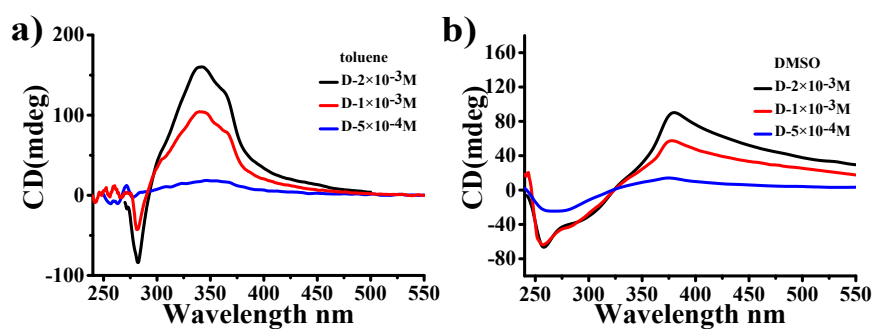

**Figure S4.** The relevant CD data of different concentrations ( $c=5 \times 10^{-4}$  M,  $1 \times 10^{-3}$  M,  $2 \times 10^{-3}$  M) of **DG-Cm** in toluene and DMSO.

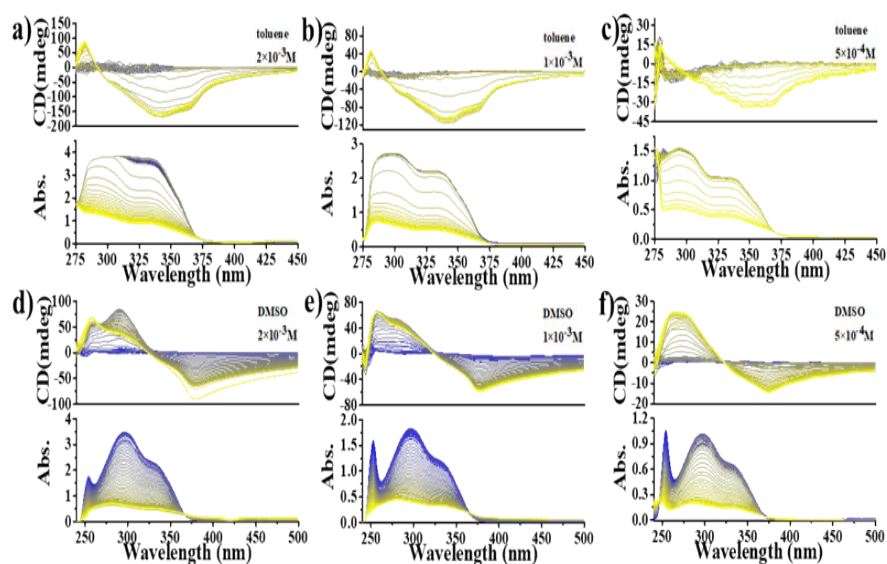

**Figure S5.** Temperature dependent CD for **LG-Cm** ( $c=2 \times 10^{-3}$  M,  $1 \times 10^{-3}$  M,  $5 \times 10^{-4}$  M) in (a-c) toluene and (d-f) DMSO with cooling rate of  $1 \text{ K min}^{-1}$ .

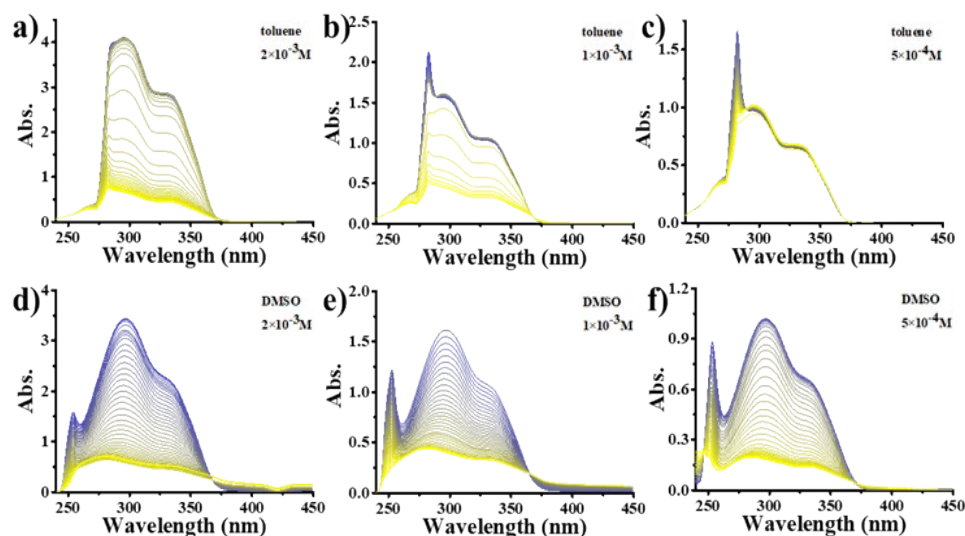

**Figure S6.** Temperature dependent UV-vis spectra for **LG-Cm** ( $c=2\times 10^{-3}$  M,  $1\times 10^{-3}$  M,  $5\times 10^{-4}$  M) in (a-c) toluene and (d-f) DMSO with cooling rate of 1K/min.

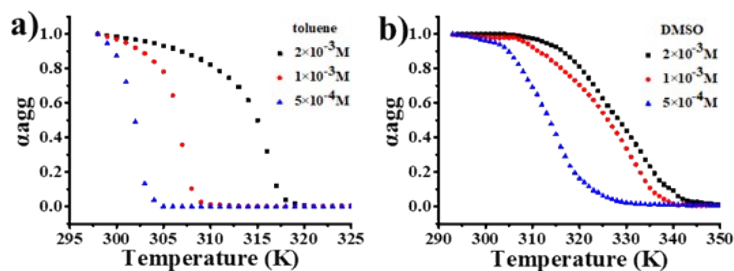

**Figure S7.** The temperature-dependent degree of aggregation ( $\alpha_{agg}$ ) of **LG-Cm** assemblies in (a) toluene and (b) DMSO of **LG-Cm** ( $c=2\times 10^{-3}$  M black,  $1\times 10^{-3}$  M red,  $5\times 10^{-4}$  M blue) determined by temperature dependent UV-vis spectra upon cooling from 325/350 K to 298 K (1 K/min).

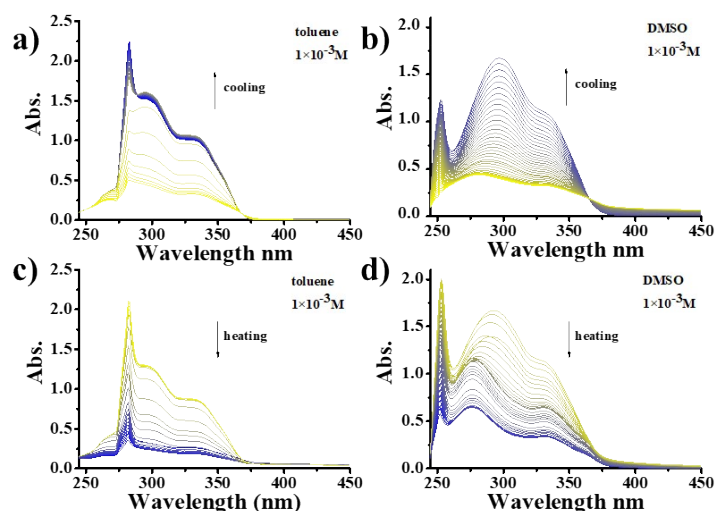

**Figure S8.** Temperature dependent UV-vis spectra for **LG-Cm** ( $c = 1\times 10^{-3}$  M) in (a) toluene and (b) DMSO upon cooling from 325/350 K to 298 K, and in (c) toluene and (d) DMSO upon heating from 298 K to 325/350 K ( $1\text{ K min}^{-1}$ ).

## References

- 1 P. Jonkheijm, P. van der Schoot, A. P. H. J. Schenning and E. W. Meijer. *Science*, 2006, **313**,80-83.
- 2 M. M. J. Smulders, M. M. L. Nieuwenhuizen, T. F. A. de Greef, P. van der Schoot, A. P. H. J. Schenning and E. W. Meijer. *Chem. Eur. J.*, 2010, **16**, 362-367.
